# Supplementary material for: The mycobacterial phosphatase PtpA regulates the expression of host genes and promotes cell proliferation
Source: PubMed Central journal article supplement (PMC5557760; doi:10.1038/s41467-017-00279-z), 2017-08-15
Supplement: 41467_2017_279_MOESM1_ESM.pdf [file 41467_2017_279_MOESM1_ESM.pdf]

File name: Supplementary Information

Description: Supplementary Figures and Supplementary Table

File name: Supplementary Data 1

Description: The list of 3351 candidate Mtb PtpA-specific ChIP-seq signals.

File name: Supplementary Data 2

Description: The list of 280 candidate Mtb PtpA-regulated protein-coding genes.

File name: Peer Review File

Description:

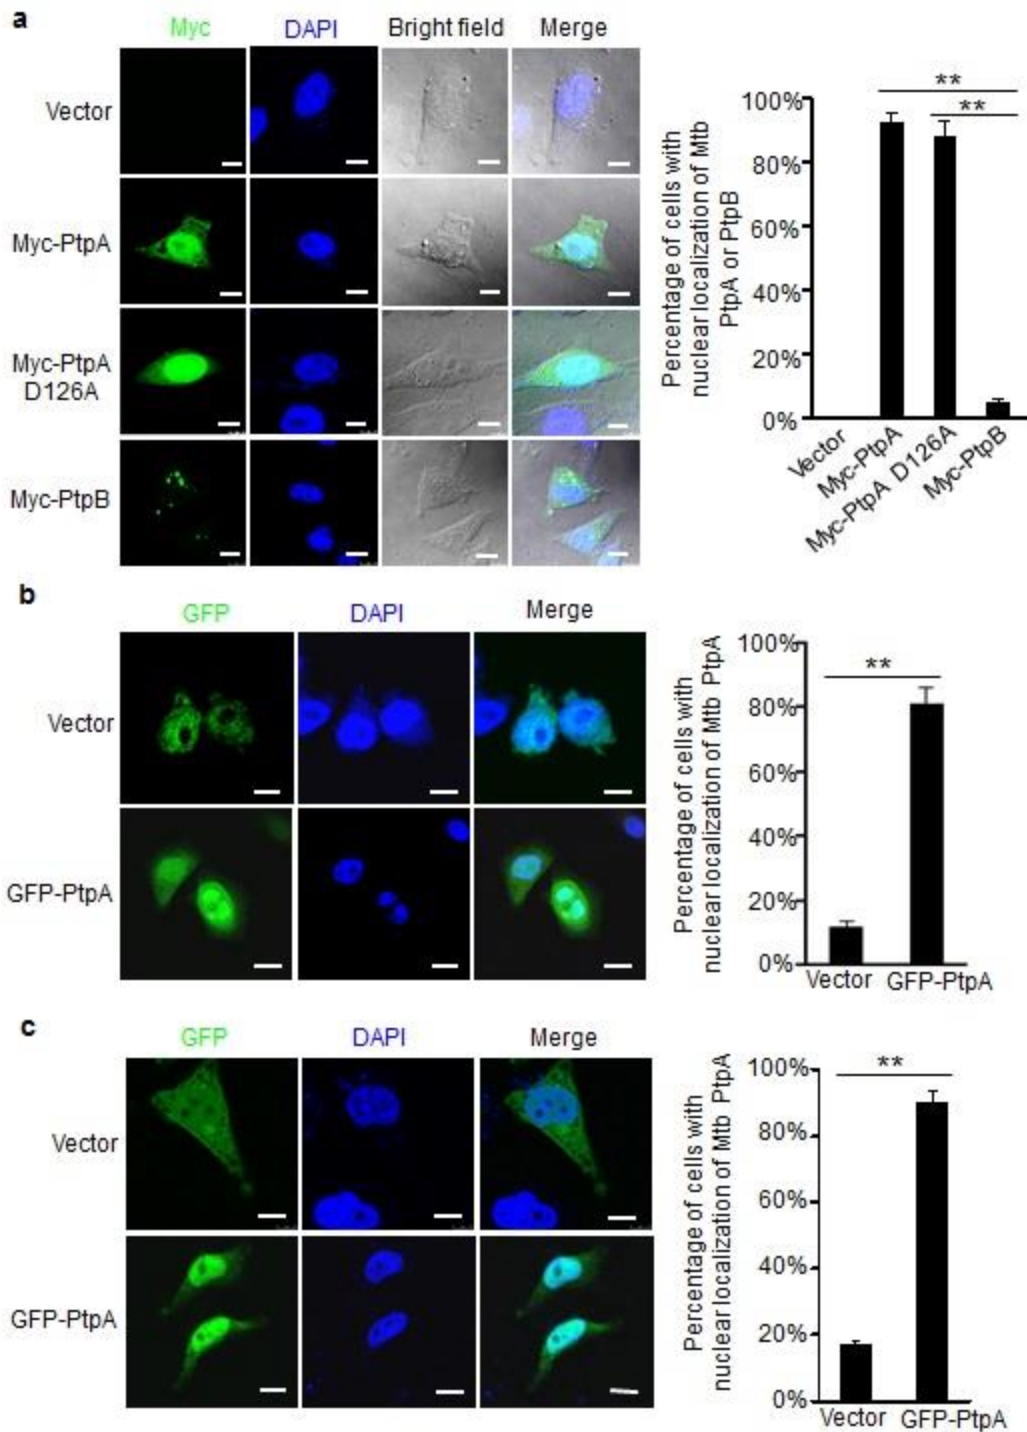

**Supplementary Figure 1: *M. tuberculosis* PtpA is present both in the cytoplasm and nucleus of host cells.** (a) U937 cells were transfected with an empty vector or a vector encoding Myc-tagged wild-type PtpA (Myc-PtpA, green), or PtpA D126A (Myc-PtpA D126A, green), or PtpB (Myc-PtpB, green), and then examined by confocal microscopy at 24 h post-transfection. (b, c) U937 cells (b) or A549 cells (c) were transfected with an empty

vector encoding GFP (green) alone or GFP-PtpA (green), and then examined by confocal microscopy at 24 h post-transfection. Nuclei (blue) were stained with DNA-binding dye (DAPI). Scale bars, 10  $\mu\text{m}$ . Right, percentage of cells with nuclear localization of *M. tuberculosis* (Mtb) PtpA or PtpB. About 200 cells were counted. \* $P < 0.05$  and \*\*  $P < 0.01$  (unpaired two-tailed Student's  $t$  test). Data are representative of one experiment with at least three independent biological replicates (**a-c**; mean and s.e.m.,  $n = 3$ ).

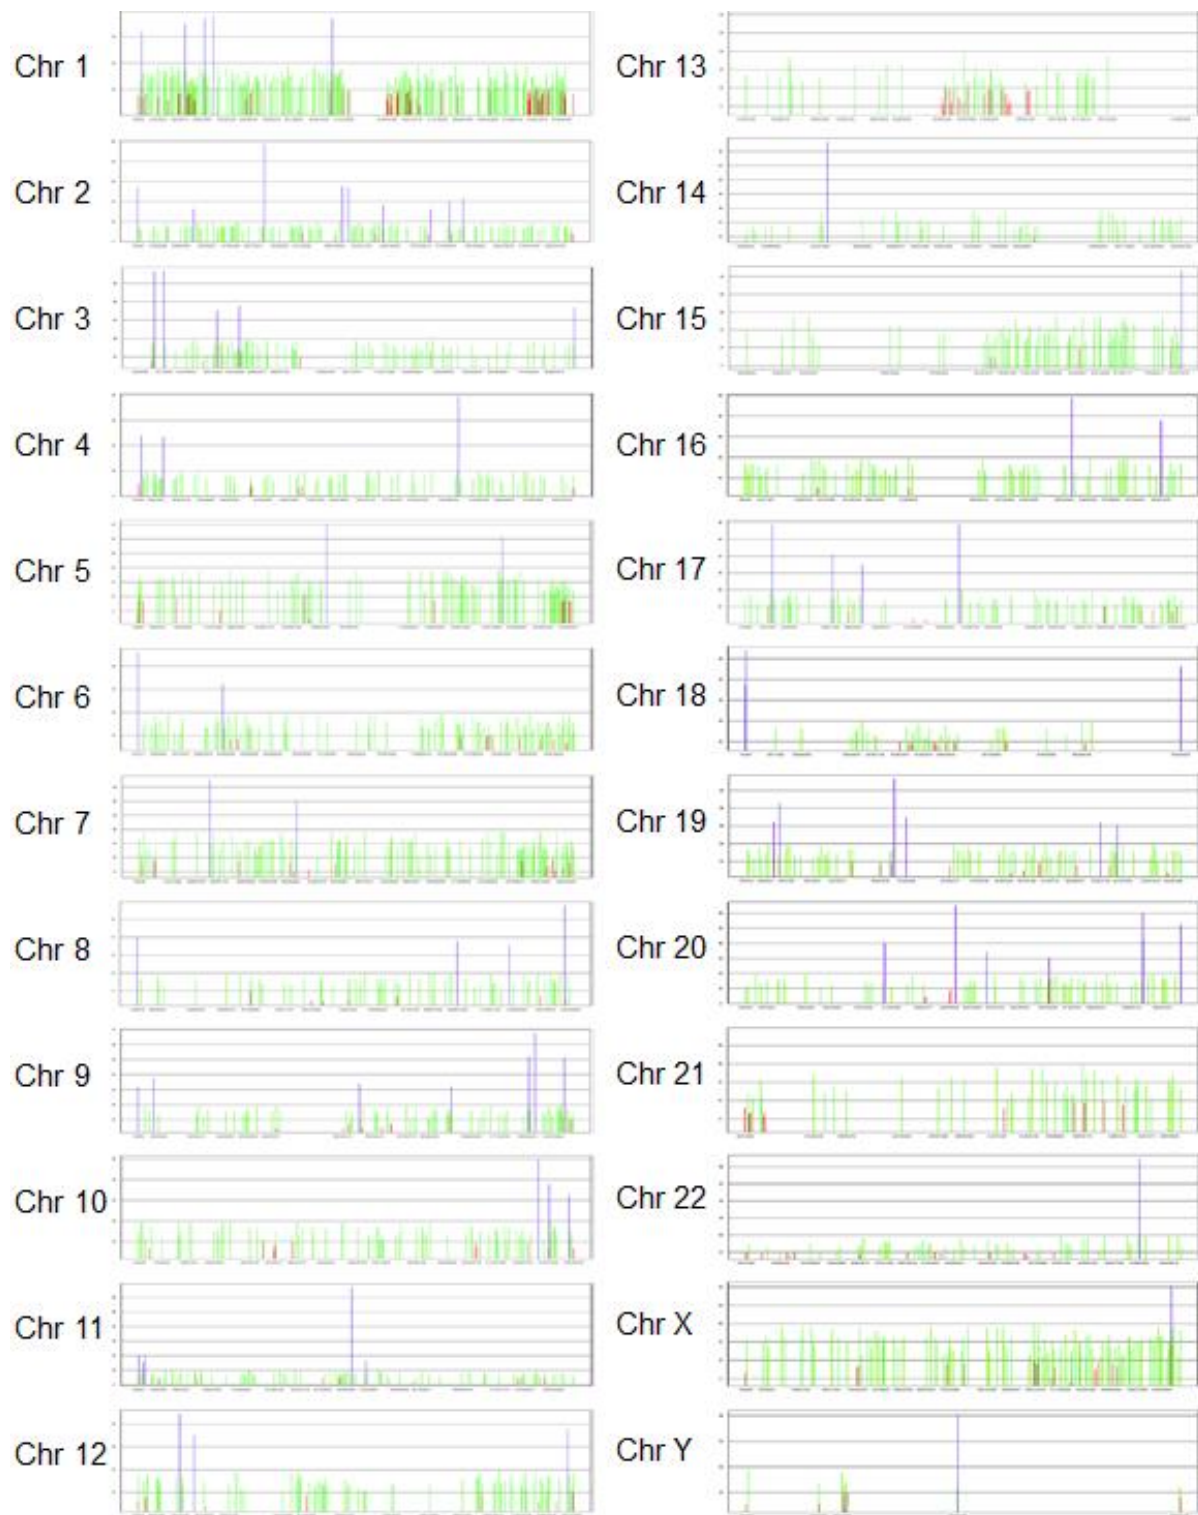

**Supplementary Figure 2: Distribution of the 3351 PtpA ChIP-seq signals in chromosomes.** Red: fold-enrichment < 10; Green: 10 < fold-enrichment < 20; Purple: fold-enrichment > 20.

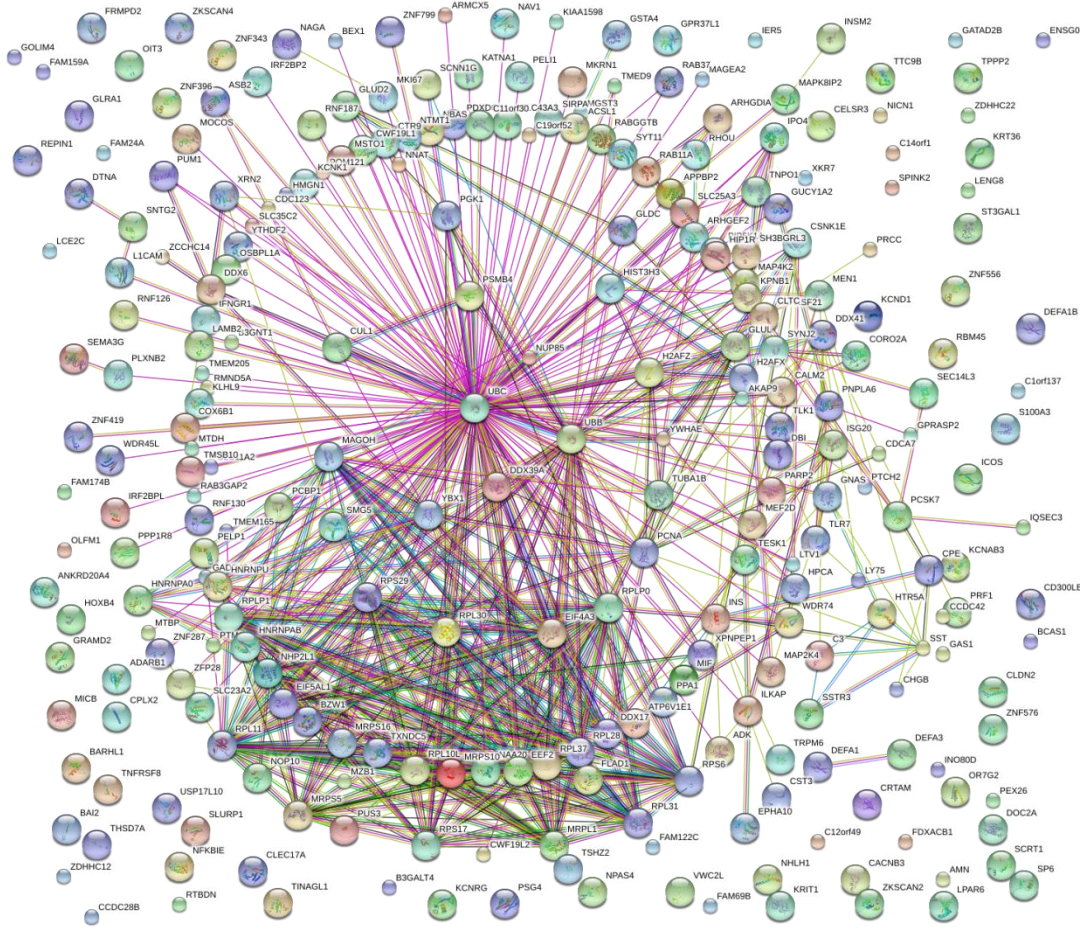

**Supplementary Figure 3: The network of proteins encoded by 280 potential PtpA target genes.** The protein-protein interaction network was visualized by the STRING 10.0.

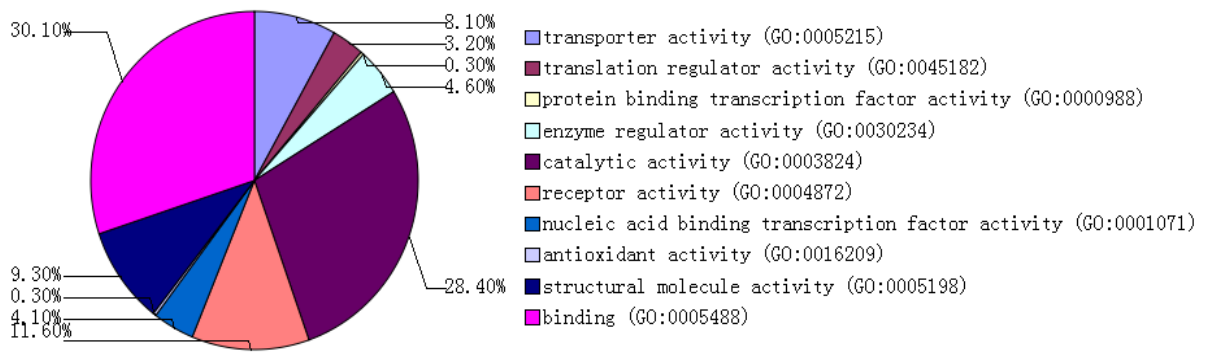

**Supplementary Figure 4: Gene ontology enrichment analysis results.** The pie chart presents the specific ontology (GO) terms for proteins encoded by 280 potential PtpA target genes.

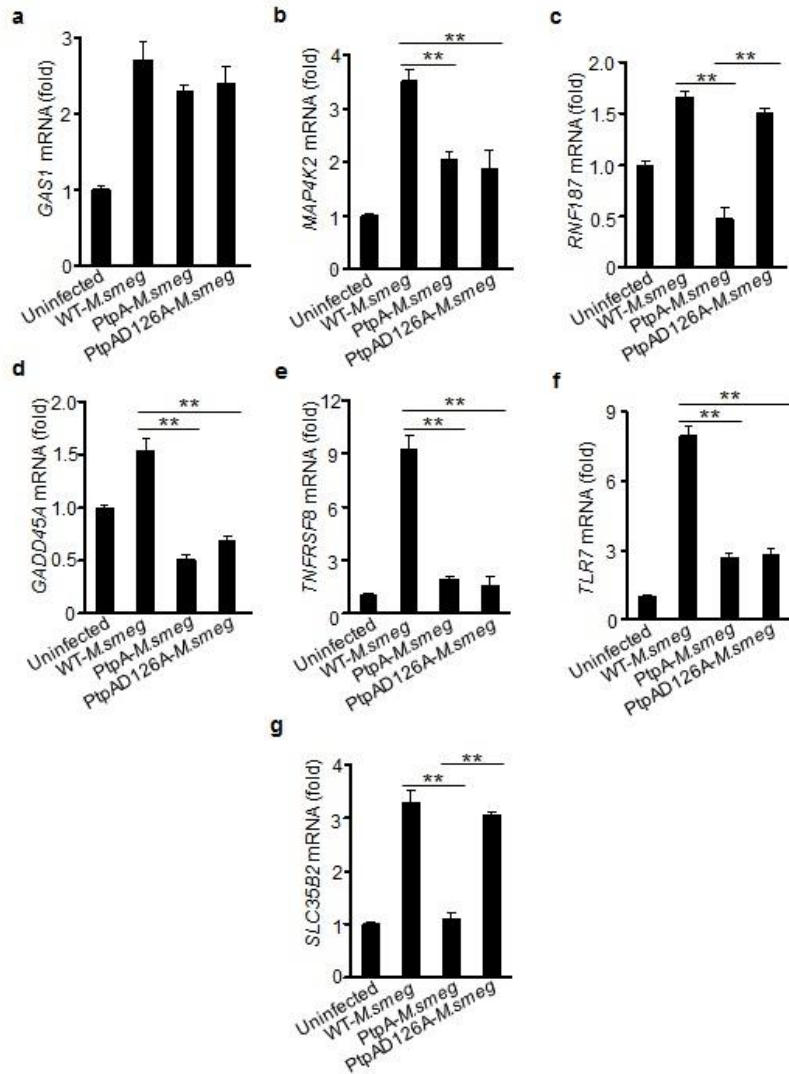

**Supplementary Figure 5: Transcriptional regulation of potential target genes by PtpA.**

Quantitative PCR analysis of *GAS1*, *MAP4K2*, *RNF187*, *GADD45A*, *TNFRSF8*, *TLR7* and *SLC35B2* mRNAs were performed using U937 cells infected with wild-type *M. smegmatis* (WT-*M. smeg*), or Mtb PtpA-overexpressing *M. smegmatis* (PtpA-*M. smeg*), or PtpA D126A-overexpressing *M. smegmatis* (PtpA D126A-*M. smeg*) for 12 h. Analysis of each gene was normalized to the gene *Gapdh*. \* $P < 0.05$  and \*\*  $P < 0.01$  (unpaired two-tailed Student's *t* test). Data are representative of one experiment with at least three independent biological replicates (a-g; mean and s.e.m.,  $n = 3$ ).

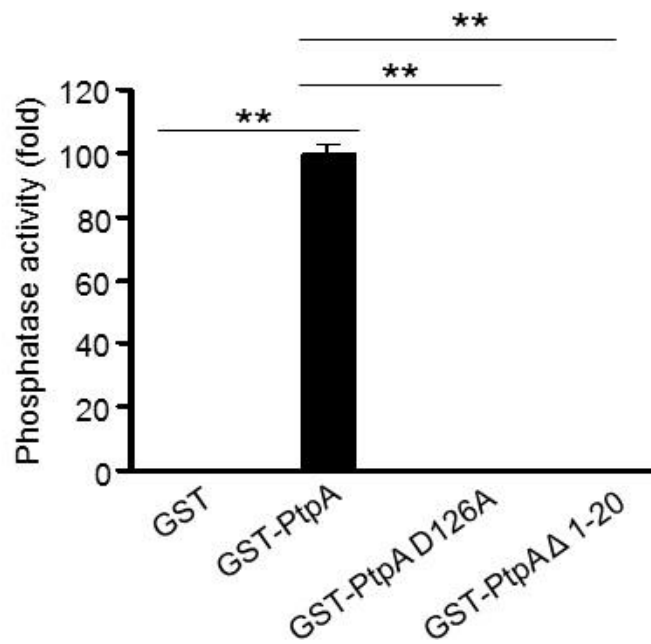

**Supplementary Figure 6: The DNA-binding region of PtpA is required for its phosphatase activity.** Para-nitrophenyl phosphate phosphatase assay. Purified GST, GST-PtpA, GST-PtpA D126A, or GST-PtpA Δ 1-20 proteins (2.5 μM) were incubated with 10 mM para-nitrophenyl phosphate (pNPP) at 37°C for 30 min. OD value was read at 405 nm. \* $P < 0.05$  and \*\*  $P < 0.01$  (unpaired two-tailed Student's  $t$  test). Data are representative of one experiment with at least three independent biological replicates (mean and s.e.m.,  $n = 3$ ).



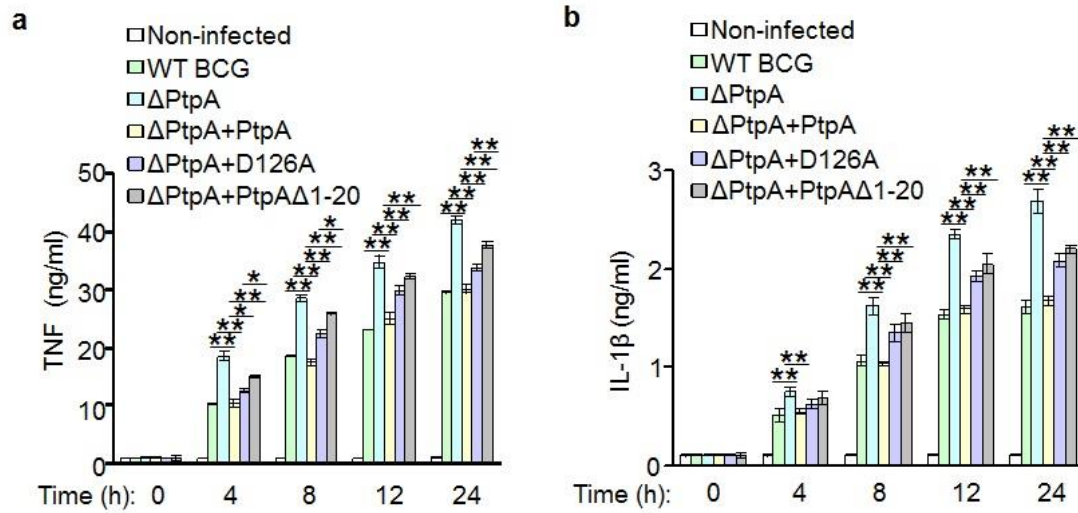

**Supplementary Figure 7: Deletion of the DNA-binding region of PtpA abolishes its inhibitory effects on the production of TNF and IL-1 $\beta$ .** Enzyme-linked immunosorbent assay (ELISA) of TNF (a) and IL-1 $\beta$  (b) in the medium of U937 cells infected with WT BCG, or PtpA-deleted BCG (BCG  $\Delta$ PtpA), or BCG  $\Delta$ PtpA complemented with WT PtpA ( $\Delta$ PtpA + PtpA), or BCG  $\Delta$ PtpA complemented with PtpA D126A ( $\Delta$ PtpA + D126A), or BCG  $\Delta$ PtpA complemented with PtpA  $\Delta$ 1-20 ( $\Delta$ PtpA + PtpA  $\Delta$ 1-20) at a MOI of 10. \* $P < 0.05$  and \*\*  $P < 0.01$  (unpaired two-tailed Student's  $t$  test). Data are representative of one experiment with at least three independent biological replicates (a, b; means and s.e.m. of  $n = 3$  cultures).

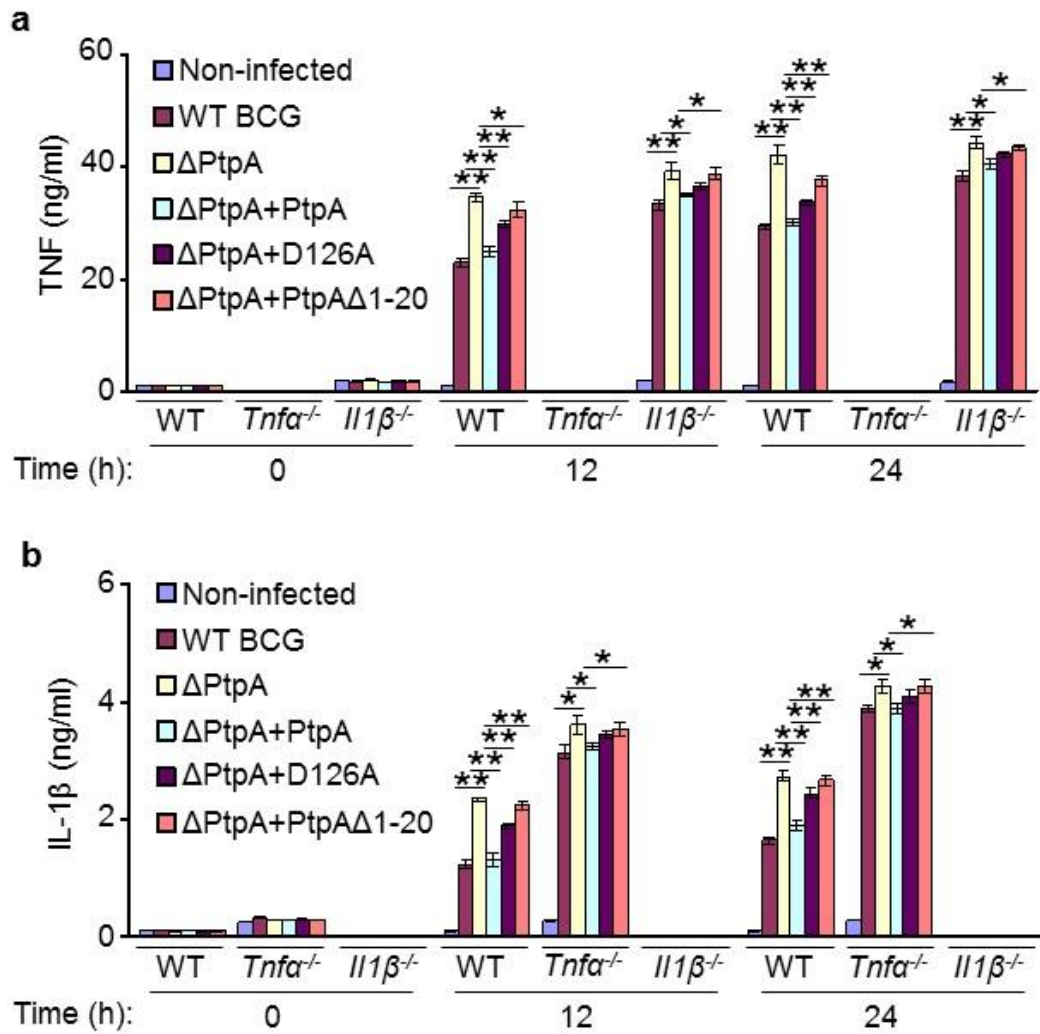

**Supplementary Figure 8: Nuclear PtpA-mediated immune suppression response is partially dependent on TNF and IL-1 $\beta$ .** (a, b) ELISA of TNF (a) and IL-1 $\beta$  (b) in the medium of the bone marrow derived macrophages (BMDMs) from WT or *Tnfa*<sup>-/-</sup> or *Il1β*<sup>-/-</sup> mice. Cells were infected with WT BCG, or BCG  $\Delta$ PtpA, or BCG ( $\Delta$ PtpA + PtpA), or BCG ( $\Delta$ PtpA + D126A), or BCG ( $\Delta$ PtpA + PtpA  $\Delta$ 1-20) at a MOI of 10. \* $P < 0.05$  and \*\*  $P < 0.01$  (unpaired two-tailed Student's *t* test). Data are representative of one experiment with at least three independent biological replicates (a, b; means and s.e.m. of  $n = 3$  cultures).

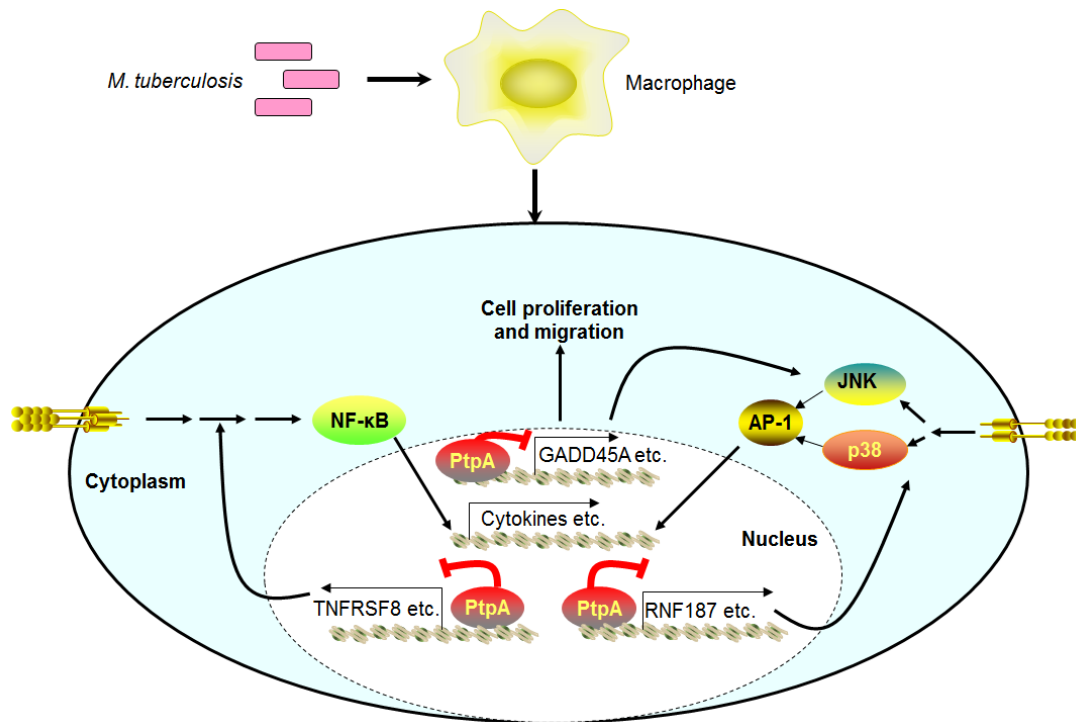

**Supplementary Figure 9: Proposed model depicting the roles of PtpA plays in the nucleus of host cells during mycobacterial infection.** PtpA inhibits the transcription of certain host genes such as *TNFRSF8* and *RNF187*, which might lead to inhibition of innate immune signaling pathways. Furthermore, PtpA promotes cell proliferation and migration of infected cells, partially through regulating the cell cycle checkpoint protein-coding gene *GADD45A*.

**Fig. 1c**

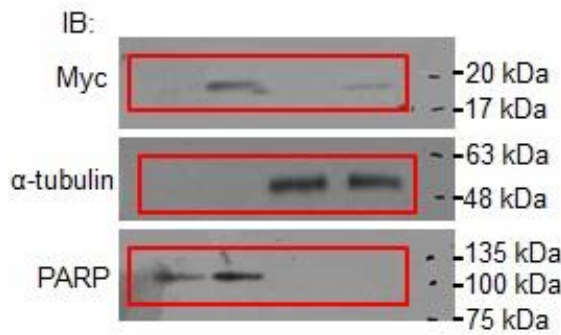

**Fig. 1d**

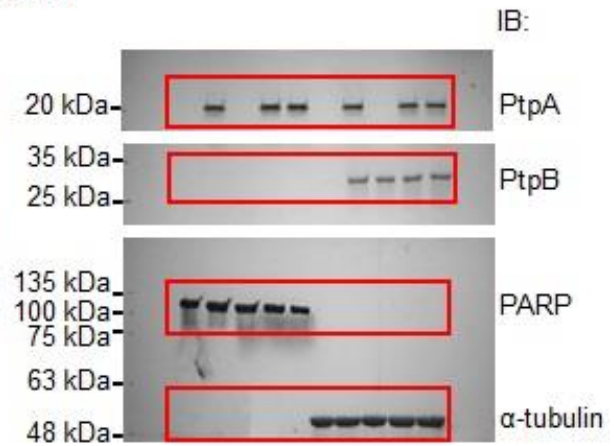

**Fig. 5a**

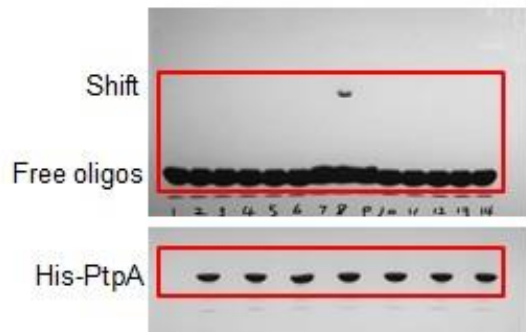

**Fig. 5b**

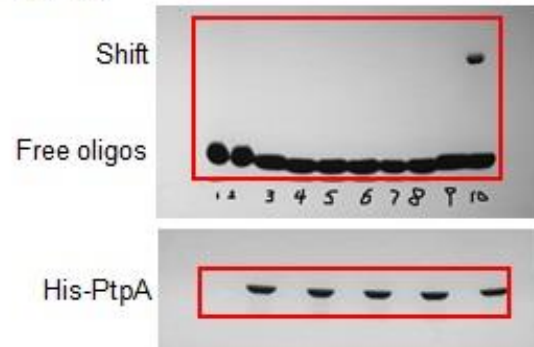

**Fig. 5c**

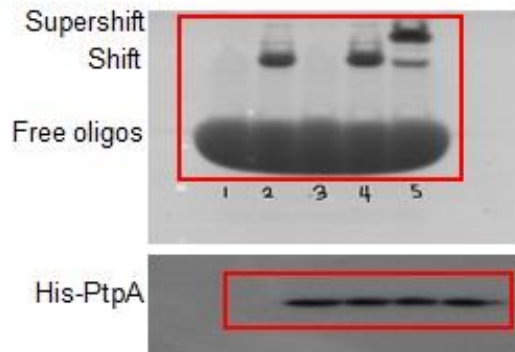

**Fig. 5e**

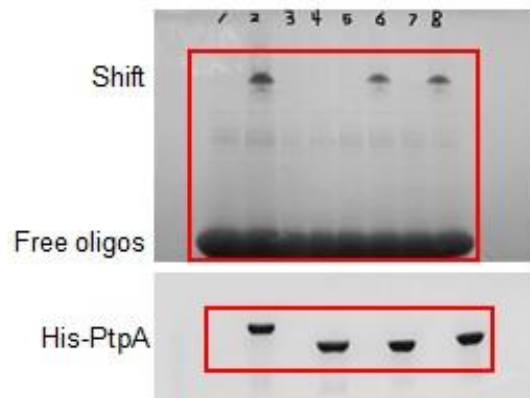

**Supplementary Figure 10: Original uncropped scans of blots for Figure 1 and 5.**

**Supplementary Table 1. Plasmids, bacterial strains and oligonucleotides used in this study.**

| Name                        | Description                                                                                                                                                                                                      | Reference   |
|-----------------------------|------------------------------------------------------------------------------------------------------------------------------------------------------------------------------------------------------------------|-------------|
| <b>Plasmids</b>             |                                                                                                                                                                                                                  |             |
| pEGFP-N1                    | CMV promoter, for mammalian expression, GFP tag, Kan <sup>R</sup>                                                                                                                                                | Clontech    |
| pEGFP-N1-PtpA               | For expression of GFP-PtpA in mammalian cells                                                                                                                                                                    | This study  |
| p3xFlag-CMV14               | CMV promoter, for mammalian expression, 3xFlag tag, Amp <sup>R</sup>                                                                                                                                             | Sigma       |
| p3xFlag-CMV14-PtpA          | For expression of Flag-PtpA in mammalian cells                                                                                                                                                                   | This study  |
| p3xFlag-CMV14-PtpA (1-20)   | For expression of Flag-PtpA in mammalian cells                                                                                                                                                                   | This study  |
| pcDNA6A                     | T7 promoter, for mammalian expression, Myc tag, Amp <sup>R</sup>                                                                                                                                                 | Invitrogen  |
| pcDNA6A-PtpA                | For expression of Myc-PtpA in mammalian cells                                                                                                                                                                    | This study  |
| pET30a                      | T7 promoter, for bacterial expression, 6xHis tag, Kan <sup>R</sup>                                                                                                                                               | Novagen     |
| pET30a-PtpA                 | For expression of recombinant protein His <sub>6</sub> -PtpA                                                                                                                                                     | This study  |
| pET30a-PtpA (Δ1-20)         | For expression of recombinant protein His <sub>6</sub> -PtpA (Δ1-20)                                                                                                                                             | This study  |
| pET30a-PtpA (Δ41-49)        | For expression of recombinant protein His <sub>6</sub> -PtpA (Δ41-49)                                                                                                                                            | This study  |
| pET30a-PtpA (Δ65-75)        | For expression of recombinant protein His <sub>6</sub> -PtpA (Δ65-75)                                                                                                                                            | This study  |
| pRL-TK                      | Used in dual-luciferase assay for NF-κB and MAPK pathways                                                                                                                                                        | Feng Shao   |
| pGL2-Basic                  | Promoterless vector for measuring the activity of promoter and enhancer sequences with a luciferase assay.                                                                                                       | Promega     |
| pGL2-Basic-GADD45A promoter | Used in dual-luciferase assay for measuring the activity of promoter                                                                                                                                             | This study  |
| pGL2-Basic-RNF187 promoter  | Used in dual-luciferase assay for measuring the activity of promoter                                                                                                                                             | This study  |
| pGL2-Basic-GAS1 promoter    | Used in dual-luciferase assay for measuring the activity of promoter                                                                                                                                             | This study  |
| pGL2-Basic-SLC35B2 promoter | Used in dual-luciferase assay for measuring the activity of promoter                                                                                                                                             | This study  |
| pGL2-Basic-TLK1 promoter    | Used in dual-luciferase assay for measuring the activity of promoter                                                                                                                                             | This study  |
| pGL2-Basic-TLR7 promoter    | Used in dual-luciferase assay for measuring the activity of promoter                                                                                                                                             | This study  |
| pGL2-Basic-MAP4K2 promoter  | Used in dual-luciferase assay for measuring the activity of promoter                                                                                                                                             | This study  |
| pGL2-Basic-TNFRSF8 promoter | Used in dual-luciferase assay for measuring the activity of promoter                                                                                                                                             | This study  |
| <b>Strains</b>              |                                                                                                                                                                                                                  |             |
| <i>E. coli</i> DH5α         | F <sup>-</sup> φ80lacZΔM15 Δ ( <i>lacZYA-argF</i> ) U169 <i>recA1 endA1 hsdR17</i> ( <i>r<sub>k</sub></i> <sup>-</sup> , <i>m<sub>k</sub></i> <sup>+</sup> ) <i>phoA supE44 λ<sup>-</sup> thi-1 gyrA96 relA1</i> | Invitrogen  |
| <i>E. coli</i> BL21 (DE3)   | F <sup>-</sup> <i>ompT hsdS<sub>B</sub></i> ( <i>r<sub>B</sub></i> <sup>-</sup> <i>m<sub>B</sub></i> <sup>-</sup> ) <i>gal dcm</i> (DE3)                                                                         | Novagen     |
| <i>M. bovis</i> BCG         | Pasteur                                                                                                                                                                                                          | ATCC 35734  |
| <i>M. smegmatis</i>         | mc <sup>2</sup> 155                                                                                                                                                                                              | ATCC 700084 |
| PtpA- <i>M. smegmatis</i>   | Mtb PtpA-overexpressing <i>M. smegmatis</i>                                                                                                                                                                      | This study  |
| BCG Δ PtpA                  | BCG strain with deletion of PtpA                                                                                                                                                                                 | This study  |

|                                           |                                                                                                                                          |            |
|-------------------------------------------|------------------------------------------------------------------------------------------------------------------------------------------|------------|
| BCG ( $\Delta$ PtpA + PtpA)               | created by introducing the integrative vector pMV306 carrying the ptpA gene and promoter into the BCG $\Delta$ PtpA strain               | This study |
| BCG ( $\Delta$ PtpA + D126A)              | created by introducing the integrative vector pMV306 carrying the ptpA (D126A) gene and promoter into the BCG $\Delta$ PtpA strain       | This study |
| BCG ( $\Delta$ PtpA + PtpA $\Delta$ 1-20) | created by introducing the integrative vector pMV306 carrying the PtpA $\Delta$ 1-20 gene and promoter into the BCG $\Delta$ PtpA strain | This study |
| <b>Oligonucleotides (5'-3')</b>           |                                                                                                                                          |            |
| pEGFP-N1-PtpA-F                           | CCCAAGCTTGTGTCTGATCCGCTGCACGTC                                                                                                           | This study |
| pEGFP-N1-PtpA-R                           | GCCTGCAGACTCGGTCCGTTCCGCGCGAGACGT                                                                                                        | This study |
| p3xFlag-CMV14-PtpA-F                      | CCCAAGCTTGTGTCTGATCCGCTGCACGTC                                                                                                           | This study |
| p3xFlag-CMV14-PtpA-R                      | GCTCTAGAACTCGGTCCGTTCCGCGCGAGACGT                                                                                                        | This study |
| pcDNA6A-PtpA-F                            | CCCGAATTCGTGTCTGATCCGCTGCACGTC                                                                                                           | This study |
| pcDNA6A-PtpA-R                            | GCCTCGAGACTCGGTCCGTTCCGCGCGAGACGT                                                                                                        | This study |
| pET30a-PtpA-F                             | CCCGGATCCGTGTCTGATCCGCTGCACGTC                                                                                                           | This study |
| pET30a-PtpA-R                             | GCAAGCTTCTCGGTCCGTTCCGCGCGAGACGT                                                                                                         | This study |
| pET30a-PtpA-F ( $\Delta$ 1-20)            | ACCTCGAGGCCGAGAAGATGTTTCGCCCA                                                                                                            | This study |
| pET30a-PtpA-R ( $\Delta$ 1-20)            | TCTCGGCCTCGAGGTTAACGGATCCAGC                                                                                                             | This study |
| pET30a-PtpA-F ( $\Delta$ 41-49)           | TGCGAGTGGTAGGCAGTTGCGCCGACGA                                                                                                             | This study |
| pET30a-PtpA-R ( $\Delta$ 41-49)           | TGCCTACCACTCGCACCCGCGTCACCCA                                                                                                             | This study |
| pET30a-PtpA-F ( $\Delta$ 65-75)           | GAGCCCACGTCGGCACCGAACACCTGGC                                                                                                             | This study |
| pET30a-PtpA-R ( $\Delta$ 65-75)           | GTGCCGACGAGGGCTCGCAACACCCCGG                                                                                                             | This study |
| pGL2-Basic- <i>GADD45A</i> promoter-F     | TCAGCTGGTGGGCGTCCAGAAGGAT                                                                                                                | This study |
| pGL2-Basic- <i>GADD45A</i> promoter-R     | ACTCACCTTTCGGTCTTCTGCTCTCC                                                                                                               | This study |
| pGL2-Basic- <i>RNF187</i> promoter-F      | TTAGCCGGGCGTCGTGGCAGGCGCC                                                                                                                | This study |
| pGL2-Basic- <i>RNF187</i> promoter-R      | CGCTGGCACAGGGCGCAGGCGGCCTC                                                                                                               | This study |
| pGL2-Basic- <i>TNFRSF8</i> promoter-F     | CTTATGCATCCATCCATCCATCCAT                                                                                                                | This study |
| pGL2-Basic- <i>TNFRSF8</i> promoter-R     | CGTAGCGCCCCAGGAACAGCAGTCCC                                                                                                               | This study |
| pGL2-Basic- <i>GAS1</i> promoter-F        | CGTCAGGCTCCCTAAGCCGTTCCCTT                                                                                                               | This study |
| pGL2-Basic- <i>GAS1</i> promoter-R        | ACTGTCCCCCGCGGGCCTCGCCGCC                                                                                                                | This study |
| pGL2-Basic- <i>SLC35B2</i> promoter-F     | TGGGGCAATAAACCAGCACAGTCTC                                                                                                                | This study |
| pGL2-Basic- <i>SLC35B2</i> promoter-R     | GTAAAGCGCTCACCCGGTGATGTGG                                                                                                                | This study |
| pGL2-Basic- <i>TLR7</i> promoter-F-R      | CAGGTGGACTAAGTAGATTAAAGAA                                                                                                                | This study |
| pGL2-Basic- <i>TLR7</i> promoter-R        | CAAAGATTACAGATAACACTTTTTTA                                                                                                               | This study |
| pGL2-Basic- <i>MAP4K2</i> promoter-F      | AGCACAGGTCCCACCTCCAGCCCGG                                                                                                                | This study |
| pGL2-Basic- <i>MAP4K2</i> promoter-R      | TCGAAGCGGTCCCGCGGGTCCTGCAG                                                                                                               | This study |

|                                         |                             |            |
|-----------------------------------------|-----------------------------|------------|
| <i>GADD45A</i> promoter (-700~-550bp)-F | TCAGCTGGTGGGCGTCCAGAAGGAT   | This study |
| <i>GADD45A</i> promoter (-700~-550bp)-R | GGTTTCCACCTGCCCGGTGTAAC     | This study |
| <i>GADD45A</i> promoter (-550~-400bp)-F | GTTCTGCTTTCTGTGGAAAAGATTCT  | This study |
| <i>GADD45A</i> promoter (-550~-400bp)-R | AGCAGTAGTATTATTTCCGGTGCCCTG | This study |
| <i>GADD45A</i> promoter (-400~-250bp)-F | AATAAGCAGCTTCGCCTAGACTTAGA  | This study |
| <i>GADD45A</i> promoter (-400~-250bp)-R | GGTGGCTATTTAAATCTATTTCCAGG  | This study |
| <i>GADD45A</i> promoter (-250~-100bp)-F | CCTTAAAACAAAAGACATGAAAAGAT  | This study |
| <i>GADD45A</i> promoter (-250~-100bp)-R | TTATCCGGTTGGCGGGACCATTGG    | This study |
| <i>GADD45A</i> promoter (-100~+50bp)-F  | GAGTGCGCGCGGGACCCGCCTTCCC   | This study |
| <i>GADD45A</i> promoter (-100~+50bp)-R  | ACTCACCTTTCGGTCTTCTGCTCTCC  | This study |
| <i>GADD45A</i> -QRT-F                   | ATCCTGCGCGTCAGCAACCC        | This study |
| <i>GADD45A</i> -QRT-R                   | TGCACTGCGTGCTGGTGACG        | This study |
| <i>RNF187</i> -QRT-F                    | CGGCGCCCGCGCGCGACGGC        | This study |
| <i>RNF187</i> -QRT-R                    | CCCCGAGCCGCCCGAGTGGG        | This study |
| <i>GAS1</i> -QRT-F                      | TGGGCTGCACCGAGGCCCGG        | This study |
| <i>GAS1</i> -QRT-R                      | GCGCTGCACGGACGAATGCC        | This study |
| <i>TNFRSF8</i> -QRT-F                   | TGTTCTCGAGACGACCTCGT        | This study |
| <i>TNFRSF8</i> -QRT-R                   | GAGCCAGTACGACTCTGGCA        | This study |
| <i>Gapdh</i> -QRT-F                     | GGAGCGAGATCCCTCCAAAAT       | This study |
| <i>Gapdh</i> -QRT-R                     | GGCTGTTGTCATACTTCTCATGG     | This study |
| <i>MAP4K2</i> -QRT-F                    | CTCCAGGGAGATGTCAAAC         | This study |
| <i>MAP4K2</i> -QRT-R                    | CTCCCGAGGTGGCTGCTGTG        | This study |
| <i>SLC35B2</i> -QRT-F                   | CTCTGATGAGGTTCCCCTGG        | This study |
| <i>SLC35B2</i> -QRT-R                   | TCTTATCTGACTTGGGGTGT        | This study |
| <i>TLR7</i> -QRT-F                      | GGATGGAAAC CAGCTACTAG       | This study |
| <i>TLR7</i> -QRT-R                      | CTAACAGAACTGGCCAACAT        | This study |
| <i>Tnf</i> -QRT-F                       | GAAGTGGCAGAAGAGGCACT        | This study |
| <i>Tnf</i> -QRT-R                       | CGTGGTGGCCCCTGCCACAAG       | This study |
| <i>Il1b</i> -QRT-F                      | TGGGATGATG ATGATAACCT       | This study |
| <i>Il1b</i> -QRT-R                      | GGTCCGACAGCACGAGGCTT        | This study |
| <i>Il12b</i> -QRT-F                     | ACCCTGACCATCCAAGTCAAA       | This study |
| <i>Il12b</i> -QRT-R                     | TTGGCCTCGCATCTTAGAAAAG      | This study |
